# Supplementary material
Source: PubMed Central journal article supplement (PMC2840481)
Supplement: 0914723107_pnas.200914723SI.pdf [file 0914723107_pnas.200914723SI.pdf]

# Supporting Information

Karatekin et al. 10.1073/pnas.0914723107

## Other Supporting Information

[SI Text](#)
